# Supplementary material
Source: Springer Nature journal article supplement (http://www.springermedizin.de/resource/supplementary/12891_2005_172_MOESM3_ESM.pdf/9510660)
Supplement: MOESM3 [file 9510660]

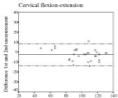

Mean flexion-extension 1st and 2nd measurement

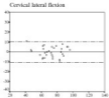

Mean lateral flexion 1st and 2nd measurement

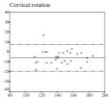

Mean rotation 1st and 2nd measurement
